# Supplementary material for: Lithium intercalation and diffusion in TiO2 nanotubes: a first-principles investigation
Source: Royal Society of Chemistry journal article supplement (doi:10.1039/c6cp03830a), 2016-01-01
Supplement: c6cp03830a1.pdf [file c6cp03830a1.pdf]

# Lithium intercalation and diffusion in the TiO<sub>2</sub> nanotubes: A first-principles investigation

*Ke Liang, Xue Chen, Zhenyu Guo†\*, Tingjun Hou, Xiaohong Zhang, and Youyong Li†\**

† Institute of Functional Nano & Soft Materials (FUNSOM), Soochow University,  
Suzhou, Jiangsu 215123, China

\* Address correspondence to [yyli@suda.edu.cn](mailto:yyli@suda.edu.cn), [zyguo@suda.edu.cn](mailto:zyguo@suda.edu.cn)

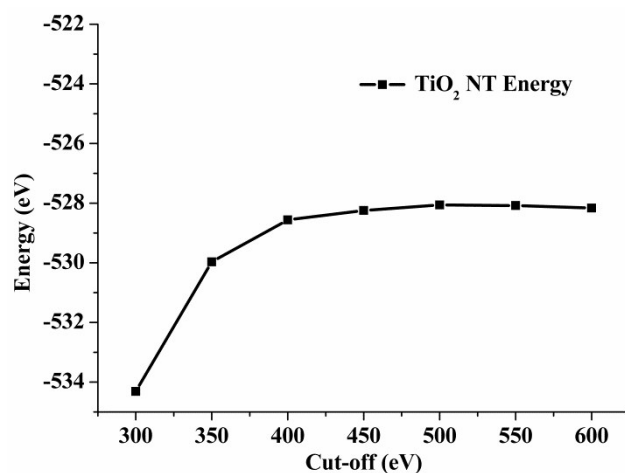

Figure S1. The correspondence of the energy of TiO<sub>2</sub> NT with the cut-off energy.

*We performed bader charge analysis to quantitatively calculate the amount of charge transfer between Li and surrounding atoms for perfect and oxygen defective nanotubes. For the transition state listed in Table S1, the net charge of lithium and titanium atoms is obviously decreased while that of surrounding oxygen is increased, when an O<sub>2c</sub> is removed. It means the transition state of TiO<sub>2</sub> nanotube with oxygen defects is energetically more favorable, therefore the oxygen vacancies lower the energy barrier of lithium diffusion.*

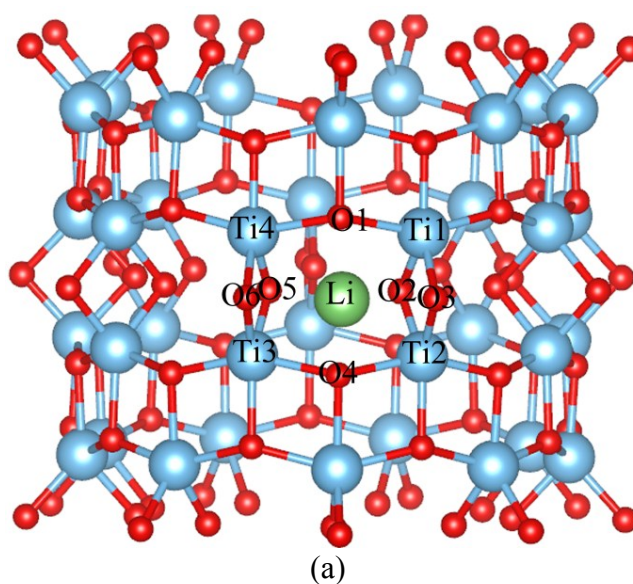

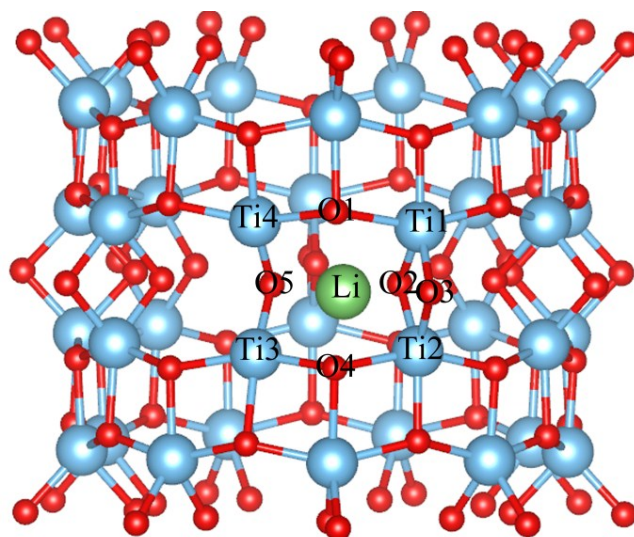

(b)

Figure S2. Li-intercalation sites and the surrounding atoms for perfect and O<sub>2c</sub>-TiO<sub>2</sub> NTs.

Table S1. Net charge analysis for Li-ion and surrounding atoms along the diffusion pathway (FS: final state, TS: transition state, IS: initial state) in perfect and O<sub>2c</sub>-TiO<sub>2</sub> NTs.

|                |    | Li     | Ti1    | Ti2    | Ti3    | Ti4    | O1      | O2      | O3      | O4      | O5      | O6      |
|----------------|----|--------|--------|--------|--------|--------|---------|---------|---------|---------|---------|---------|
| <b>perfect</b> | FS | 0.8819 | 1.9622 | 1.9654 | 1.9685 | 1.9626 | -1.1412 | -1.0881 | -0.9521 | -1.1235 | -1.0648 | -1.0921 |
|                | TS | 0.8172 | 1.9436 | 1.9405 | 1.9427 | 1.9445 | -1.2057 | -0.9704 | -0.9902 | -1.207  | -0.9918 | -0.9728 |
|                | IS | 0.8813 | 1.9602 | 1.9702 | 1.9702 | 1.9561 | -1.2108 | -0.9172 | -1.0682 | -1.2143 | -0.9504 | -0.9124 |
| <b>O2c</b>     | FS | 0.8788 | 1.9866 | 1.9864 | 1.4995 | 1.502  | -1.1568 | -1.074  | -0.9404 | -1.1352 | -1.2334 | -       |
|                | TS | 0.7937 | 1.9391 | 1.9317 | 1.5127 | 1.4946 | -1.2099 | -0.9918 | -0.9691 | -1.2196 | -1.1245 | -       |
|                | IS | 0.8714 | 1.9532 | 1.9488 | 1.5196 | 1.5121 | -1.2595 | -0.9101 | -1.0564 | -1.2745 | -1.0426 | -       |
